# Supplementary material for: Loops and the activity of loop extrusion factors constrain chromatin dynamics
Source: PubMed Central journal article supplement — Mol Biol Cell. 2023 Jul 1;34(8):ar78. doi: 10.1091/mbc.E23-04-0119 (PMC10398873; doi:10.1091/mbc.e23-04-0119), 2023-07-01
Supplement: mbc-34-ar78-s001.pdf [file mbc-34-ar78-s001.pdf]

Supplementary Materials  
*Molecular Biology of the Cell*  
Bailey *et al.*

## ***Supplemental Information***

### **Loops and the activity of loop extrusion factors constrain chromatin dynamics**

Mary Lou P. Bailey<sup>1,2\*</sup>, Ivan Surovtsev<sup>3,4\*\*</sup>, Jessica F. Williams<sup>4\*</sup>, Hao Yan<sup>2,3\*</sup>, Tianyu Yuan<sup>2,3</sup>, Kevin Li<sup>4</sup>, Katherine Duseau<sup>4</sup>, Simon G. J. Mochrie<sup>1,2,3#</sup> and Megan C. King<sup>2,4,5#</sup>

<sup>1</sup> *Department of Applied Physics, Yale University, New Haven, Connecticut 06511, USA*

<sup>2</sup> *Integrated Graduate Program in Physics Engineering Biology, Yale University, New Haven, Connecticut 06511, USA*

<sup>3</sup> *Department of Physics, Yale University, New Haven, Connecticut 06511, USA*

<sup>4</sup> *Department of Cell Biology, Yale School of Medicine, New Haven, Connecticut 06520, USA*

<sup>5</sup> *Department of Molecular, Cell and Developmental Biology, Yale University, New Haven, Connecticut 06511, USA*

\* equal contributions

# correspondence to [simon.mochrie@yale.edu](mailto:simon.mochrie@yale.edu), [megan.king@yale.edu](mailto:megan.king@yale.edu), or [ivan.surovtsev@yale.edu](mailto:ivan.surovtsev@yale.edu)

#### **Table of contents:**

|                                                                                                      |          |
|------------------------------------------------------------------------------------------------------|----------|
| <b>Supplemental Figures S1-S5</b>                                                                    | <b>2</b> |
| <b>Supplemental Table S1: MSD Fitting Results</b>                                                    | <b>6</b> |
| <b>Supplemental Table S2: Loop-extrusion-factor (LEF) Simulation and Rouse Simulation Parameters</b> | <b>7</b> |
| <b>Supplemental Table S3: Strains used in the study</b>                                              | <b>8</b> |

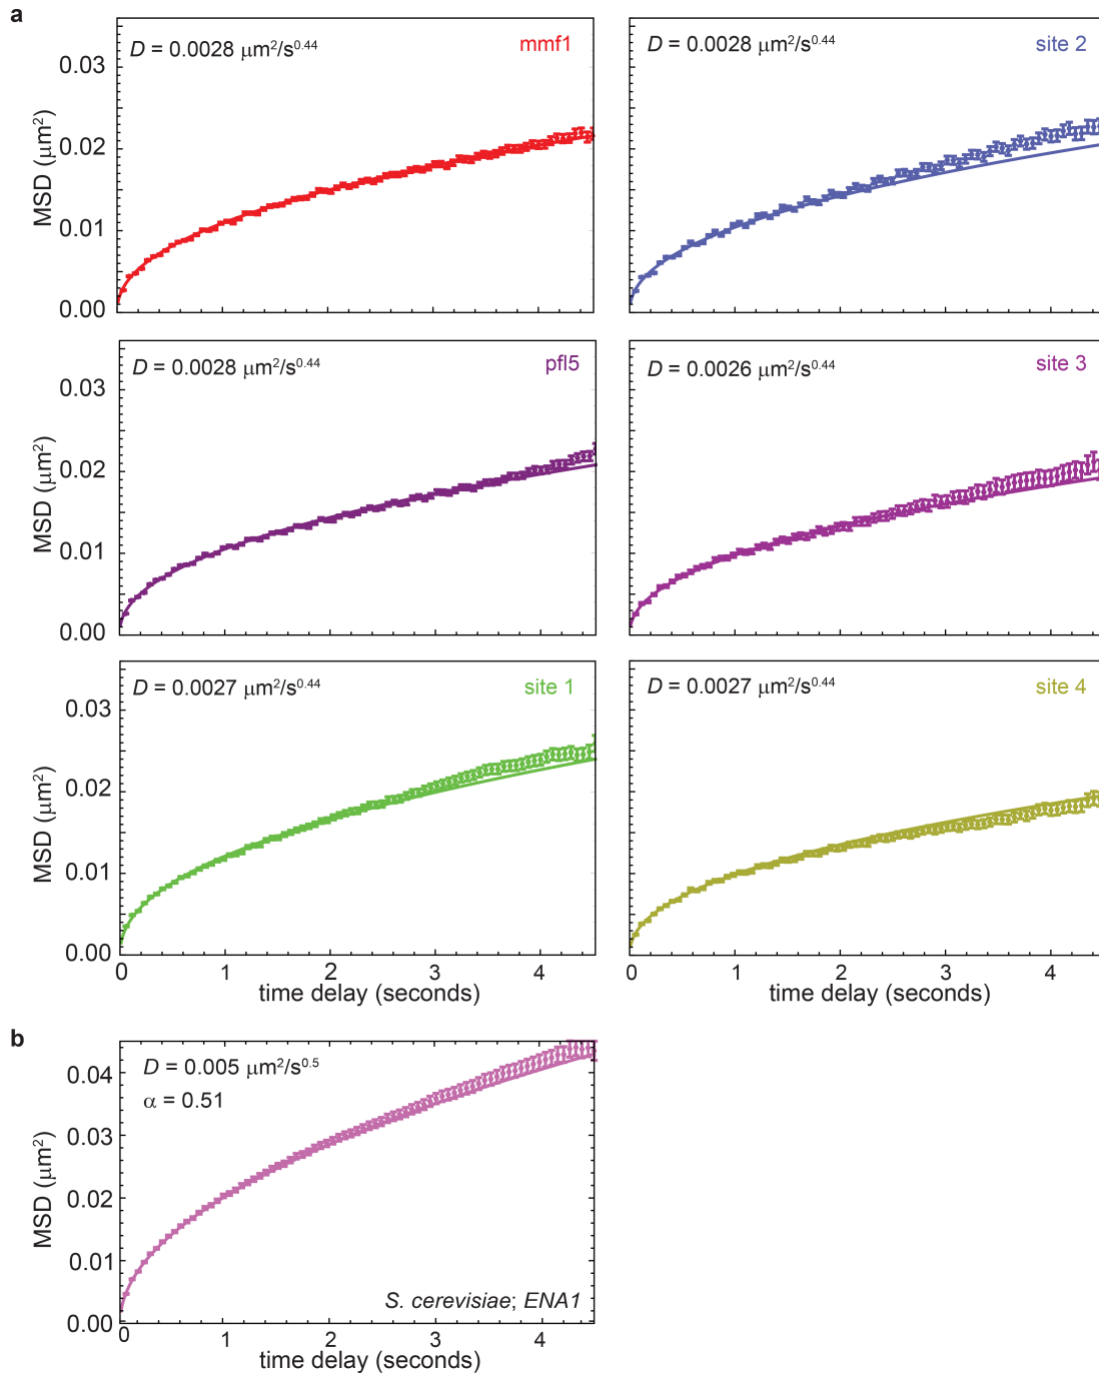

**Fig. S1. Individual MSD plots for fission yeast and budding yeast. (a)** Chromatin diffusivity is nearly identical across six different genomic locations as shown by the mean squared displacement (MSD) of each genetic locus as a function of the time window of observation, along with its calculated diffusion coefficient,  $D$ . **(b)** For comparison to previous chromatin dynamics measurements, we performed our visualization/tracking/diffusive analysis regime on *S. cerevisiae* cells integrated with a *lacO* array at the *ENA1* locus, resulting in a comparable diffusion coefficient as reported previously. Error bars indicate standard errors of the mean.

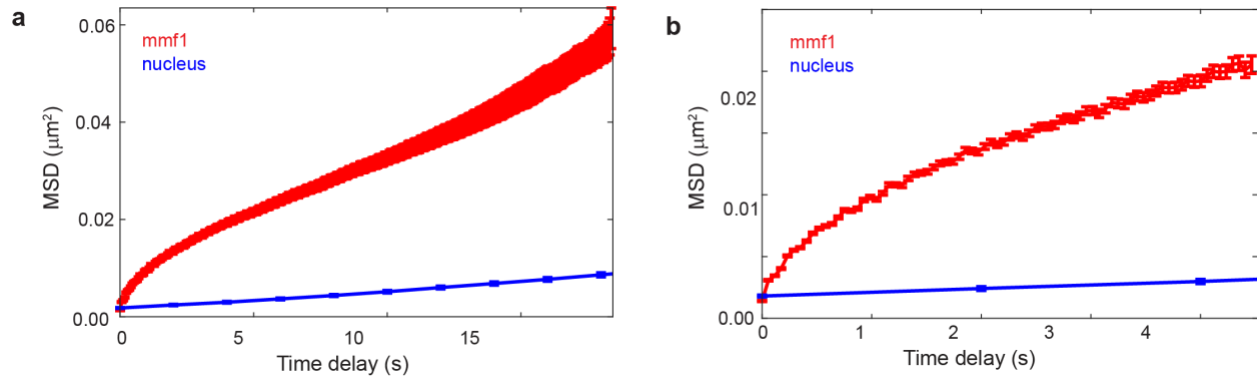

**Fig. S2. Microtubule dynamics-driven chromatin motion cannot be explained by whole-nucleus motion. (a)** and **(b)** MSD of *lacO* array near *mmf1* relative to MSD of the whole-nucleus motion at different timescales.

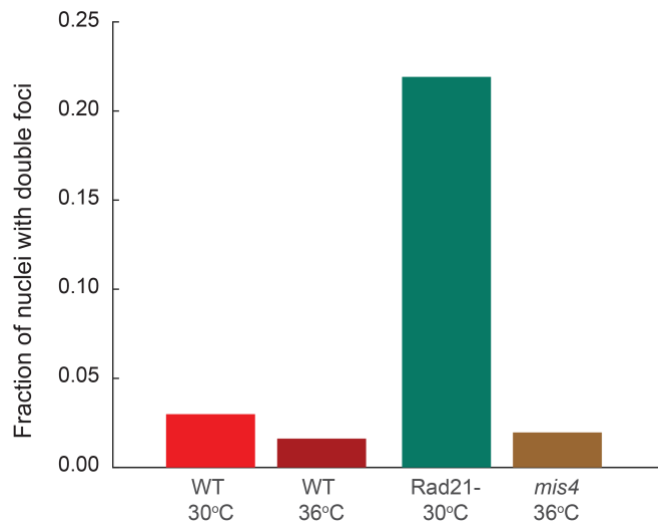

**Fig. S3. Cohesin depletion but not inactivation of cohesin loading leads to loss of cohesion.** Shown is a fraction of nuclei (of all nuclei with spots) with two spatially separated *lacO*/GFP-LacI foci as observed in single-plane time-lapse movies (details are in the Materials and Methods) for cells with *lacO* array near *mmf1* locus in wild type cells (MKSP2039) at 30C and 36C, and in cells depleted of Rad21 (MKSP3660, at 30C) or with inactivated temperature-sensitive Mis4 (MKSP2801, at 36C).

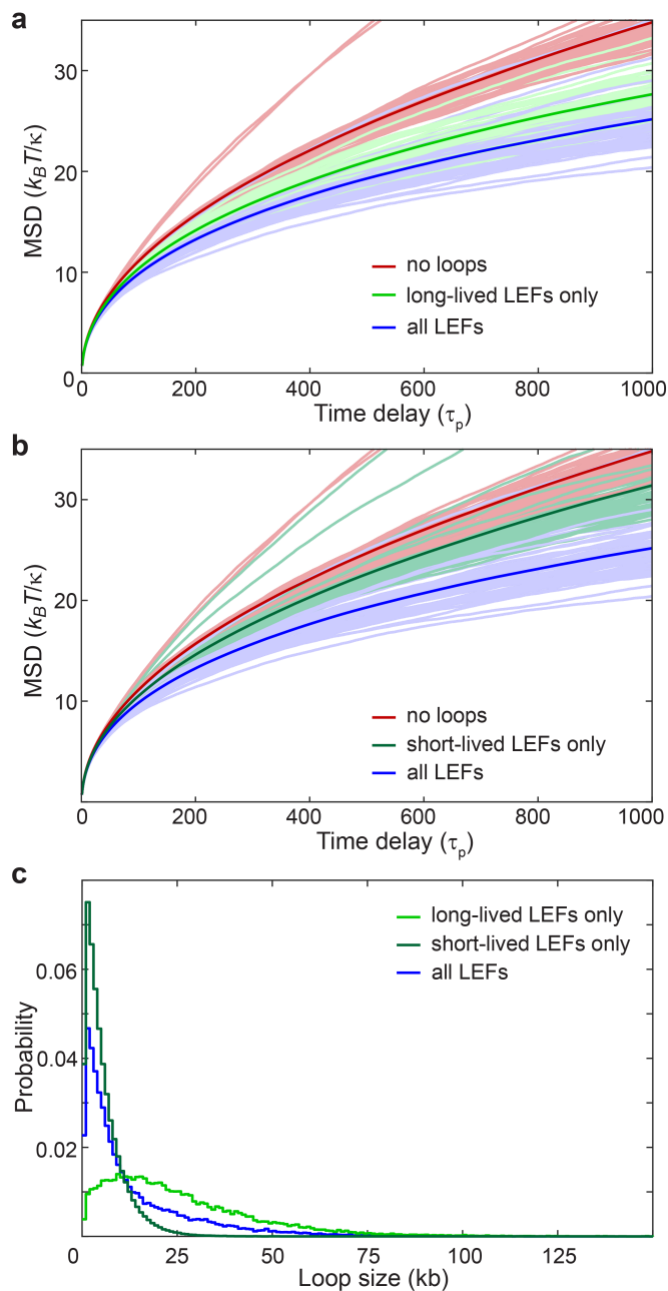

**Fig. S4. Impact of LEFs on chromatin mobility depends on LEF lifetime(s).** As in Fig. 5a but showing MSDs for individual beads split into two panels for clarity. **(a)** MSD results of the Rouse-type polymer simulations combined with loop-extrusion simulations that considered two types of LEF complexes (in equal amounts) with different lifetimes. Blue – simulations with both types of LEFs present, green – only the long-lived LEFs, red – no LEFs. Thin lines represent MSDs for each individual bead, thick lines represent the average over all beads and all simulations. **(b)** As for (a) but for simulations with only short-lived LEFs (dark green) compared to simulations with both LEFs (blue) and no LEFs (red). **(c)** Loop size distribution for simulations of fission yeast chromatin subjected to the “2 LEFs” model with both LEFs present (blue), only the long-lived LEFs present (green), and only the short-lived LEFs present (dark green).

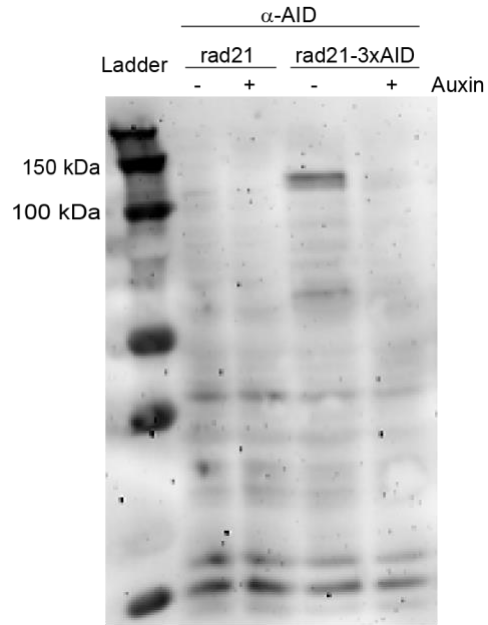

**Fig. S5. Rad21-AID can be quickly depleted from cells upon addition of the auxin analogue, 5-IAA.** Western blots of lysates of WT cells or cells with Rad21 tagged with auxin-inducible degron before or after 5-IAA treatment for 20 min.

**Supplemental Table S1: MSD Fitting Results**

| Strain                   | Varied $\alpha$ , $\sigma^2$ , $D$ |                                          |                              |                                    |                                              |                                      | Fixed $\alpha = 0.44$ , varied $\sigma^2$ , $D$ |                              |                                    |                                |                                      |
|--------------------------|------------------------------------|------------------------------------------|------------------------------|------------------------------------|----------------------------------------------|--------------------------------------|-------------------------------------------------|------------------------------|------------------------------------|--------------------------------|--------------------------------------|
|                          | $\alpha$                           | Confidence Interval (CI) on $\alpha$ fit | $\sigma^2$ , $\mu\text{m}^2$ | CI on $\sigma^2$ , $\mu\text{m}^2$ | $D$ , $\mu\text{m}^2/\text{s}$               | CI on $D$ , $\mu\text{m}^2/\text{s}$ | $\alpha$                                        | $\sigma^2$ , $\mu\text{m}^2$ | CI on $\sigma^2$ , $\mu\text{m}^2$ | $D$ , $\mu\text{m}^2/\text{s}$ | CI on $D$ , $\mu\text{m}^2/\text{s}$ |
| mmf1 WT                  | 0.43                               | 0.3695 - 0.4955                          | 0.0031                       | 0.0027 - 0.0035                    | 0.0028                                       | 0.0025 - 0.0032                      | <b>0.44</b>                                     | 0.0031                       | 0.0030 - 0.0032                    | 0.0028                         | 0.0027 - 0.0029                      |
| pfl5 WT                  | 0.42                               | 0.3613 - 0.4883                          | 0.003                        | 0.0026 - 0.0034                    | 0.0028                                       | 0.0025 - 0.0031                      | <b>0.44</b>                                     | 0.0031                       | 0.0030 - 0.0032                    | 0.0027                         | 0.0026 - 0.0028                      |
| site 1                   | 0.53                               | 0.4910 - 0.5776                          | 0.0033                       | 0.0031 - 0.0035                    | 0.0027                                       | 0.0025 - 0.0029                      | <b>0.44</b>                                     | 0.0027                       | 0.0026 - 0.0029                    | 0.0031                         | 0.0030 - 0.0031                      |
| site2                    | 0.41                               | 0.3092 - 0.5172                          | 0.0032                       | 0.0025 - 0.0039                    | 0.0028                                       | 0.0023 - 0.0033                      | <b>0.44</b>                                     | 0.0034                       | 0.0032 - 0.0036                    | 0.0027                         | 0.0026 - 0.0028                      |
| site 3                   | 0.43                               | 0.3662 - 0.4901                          | 0.003                        | 0.0026 - 0.0034                    | 0.0026                                       | 0.0023 - 0.0028                      | <b>0.44</b>                                     | 0.0031                       | 0.0029 - 0.0032                    | 0.0025                         | 0.0025 - 0.0026                      |
| site 4                   | 0.41                               | 0.3540 - 0.4641                          | 0.0028                       | 0.0024 - 0.0031                    | 0.0027                                       | 0.0024 - 0.0030                      | <b>0.44</b>                                     | 0.0029                       | 0.0028 - 0.0030                    | 0.0025                         | 0.0025 - 0.0026                      |
| mmf1 cut14 36C           | 0.54                               | 0.5081 - 0.5764                          | 0.0029                       | 0.0027 - 0.0032                    | 0.0032                                       | 0.0031 - 0.0034                      | <b>0.44</b>                                     | 0.0022                       | 0.0021 - 0.0023                    | 0.0037                         | 0.0037 - 0.0038                      |
| mmf1 mis4 36C            | 0.47                               | 0.3828 - 0.5503                          | 0.003                        | 0.0023 - 0.0038                    | 0.004                                        | 0.0035 - 0.0045                      | <b>0.44</b>                                     | 0.0028                       | 0.0026 - 0.0031                    | 0.0042                         | 0.0040 - 0.0043                      |
| pfl5 cut14 36C           | 0.43                               | 0.3918 - 0.4750                          | 0.0025                       | 0.0022 - 0.0029                    | 0.0035                                       | 0.0033 - 0.0038                      | <b>0.44</b>                                     | 0.0026                       | 0.0025 - 0.0027                    | 0.0035                         | 0.0035 - 0.0036                      |
| pfl5 mis4 36C            | 0.44                               | 0.3187 - 0.5572                          | 0.003                        | 0.0019 - 0.0040                    | 0.0039                                       | 0.0031 - 0.0047                      | <b>0.44</b>                                     | 0.003                        | 0.0027 - 0.0033                    | 0.0039                         | 0.0037 - 0.0041                      |
| mmf1 36C                 | 0.48                               | 0.4462 - 0.5170                          | 0.0031                       | 0.0029 - 0.0033                    | 0.0027                                       | 0.0026 - 0.0028                      | <b>0.44</b>                                     | 0.0029                       | 0.0028 - 0.0029                    | 0.0029                         | 0.0028 - 0.0029                      |
| pfl5 36C                 | 0.45                               | 0.4154 - 0.4839                          | 0.0026                       | 0.0024 - 0.0028                    | 0.0025                                       | 0.0024 - 0.0027                      | <b>0.44</b>                                     | 0.0026                       | 0.0025 - 0.0026                    | 0.0026                         | 0.0026 - 0.0027                      |
| mmf1 cut14 rad21- 30C    | 0.36                               | 0.3292 - 0.3932                          | 0.0026                       | 0.0022 - 0.0029                    | 0.0046                                       | 0.0043 - 0.0049                      | <b>0.44</b>                                     | 0.0033                       | 0.0032 - 0.0035                    | 0.0040                         | 0.0039 - 0.0041                      |
| mmf1 cut14 rad21- 36C    | 0.41                               | 0.3750 - 0.4470                          | 0.0028                       | 0.0025 - 0.0032                    | 0.0043                                       | 0.004 - 0.0046                       | <b>0.44</b>                                     | 0.0031                       | 0.0031 - 0.0032                    | 0.0041                         | 0.0040 - 0.0041                      |
| mmf1 + PFA               | near flat MSD                      | 0.0033                                   | 0.0029 - 0.0036              | $5.5 \times 10^{-5}$               | $-2.1 \times 10^{-4}$ - $3.3 \times 10^{-4}$ |                                      | <b>0.44</b>                                     | 0.0033                       | 0.0032 - 0.0034                    | 0.00005                        |                                      |
| mmf1 + NaN <sub>3</sub>  | 0.46                               | 0.3384 - 0.5864                          | 0.0029                       | 0.0025 - 0.0033                    | 0.0014                                       | 0.0011 - 0.0017                      | <b>0.44</b>                                     | 0.0028                       | 0.0027 - 0.0029                    | 0.0015                         | 0.0014 - 0.0016                      |
| mmf1 + MBC               | 0.42                               | 0.3327 - 0.4717                          | 0.0027                       | 0.0023 - 0.0032                    | 0.0028                                       | 0.0024 - 0.0032                      | <b>0.44</b>                                     | 0.0029                       | 0.0028 - 0.0031                    | 0.0026                         | 0.0026 - 0.0027                      |
| cen2 + + MBC             | 0.55                               | 0.1309 - 0.9721                          | 0.0042                       | 0.0029 - 0.0054                    | 0.0014                                       | $6.2 \times 10^{-4}$ - 0.0023        | <b>0.44</b>                                     | 0.0038                       | 0.0033 - 0.0043                    | 0.0017                         | 0.0014 - 0.0020                      |
| arp8                     | 0.68                               | 0.4822 - 0.8815                          | 0.004                        | 0.0034 - 0.0046                    | 0.0017                                       | 0.0014 - 0.0021                      | <b>0.44</b>                                     | 0.0031                       | 0.0027 - 0.0034                    | 0.0024                         | 0.0022 - 0.0025                      |
| arp8 cut14 30C           | 0.54                               | 0.4857 - 0.5969                          | 0.003                        | 0.0028 - 0.0033                    | 0.0021                                       | 0.0020 - 0.0023                      | <b>0.44</b>                                     | 0.0026                       | 0.0024 - 0.0027                    | 0.0025                         | 0.0024 - 0.0025                      |
| arp8 cut14 36C           | 0.68                               | 0.6290 - 0.7331                          | 0.0034                       | 0.0032 - 0.0037                    | 0.0023                                       | 0.0022 - 0.0024                      | <b>0.44</b>                                     | 0.0023                       | 0.0020 - 0.0025                    | 0.0031                         | 0.0030 - 0.0032                      |
| arp9                     | 0.44                               | 0.2652 - 0.6106                          | 0.0037                       | 0.0027 - 0.0047                    | 0.0026                                       | 0.0019 - 0.0034                      | <b>0.44</b>                                     | 0.0037                       | 0.0034 - 0.0040                    | 0.0026                         | 0.0025 - 0.0028                      |
| <i>S. cerevisiae</i> ENA | 0.506                              | 0.48 - 0.5326                            | 0.0033                       | 0.0031 - 0.0036                    | 0.005                                        | 0.0048 - 0.0052                      |                                                 |                              |                                    | 0.005                          |                                      |

**Supplemental Table S2: Loop-extrusion-factor (LEF) Simulation and Rouse Simulation Parameters**

|                                                                                        | <b>Mouse CTCF Model</b> | <b>Mouse LEF Only Model</b> | <b><i>S. pombe</i> LEF Only Model</b> | <b><i>S. pombe</i> 2 LEFs Model</b> |
|----------------------------------------------------------------------------------------|-------------------------|-----------------------------|---------------------------------------|-------------------------------------|
| <b>LEF stepping rate <math>v</math> (bp/s)</b>                                         | 60                      | 60                          | 60                                    | 60                                  |
| <b>LEF mean lifetime (s)</b>                                                           | 2000                    | 2000                        | 500                                   | 500, 50                             |
| <b>Boundary elements parameter <math>S</math></b>                                      | 20                      | N/A                         | N/A                                   | N/A                                 |
| <b>Boundary elements parameter <math>\mu</math></b>                                    | 3                       | N/A                         | N/A                                   | N/A                                 |
| <b>Number of LEFs</b>                                                                  | 48                      | 48                          | 30                                    | 15, 15                              |
| <b>Polymer characteristic time (s)</b>                                                 | 0.9                     | 0.9                         | 0.00225                               | 0.00225                             |
| <b>Rouse spring stiffness (<math>\text{pN}\cdot\mu\text{m}^{-1}</math>)</b>            | 0.3                     | 0.3                         | 6                                     | 6                                   |
| <b>Friction coefficient (<math>\text{pN}\cdot\text{s}\cdot\mu\text{m}^{-1}</math>)</b> | 1.08                    | 1.08                        | 0.054                                 | 0.054                               |



**Supplemental Table S3: Strains used in the study**

| Strain                 | Relevant genotype                                                                                                                               | Description                                                                                                                                                                                                 | Source                                             |
|------------------------|-------------------------------------------------------------------------------------------------------------------------------------------------|-------------------------------------------------------------------------------------------------------------------------------------------------------------------------------------------------------------|----------------------------------------------------|
| <i>S. pombe</i>        |                                                                                                                                                 |                                                                                                                                                                                                             |                                                    |
| Specific lacO position |                                                                                                                                                 |                                                                                                                                                                                                             |                                                    |
| MKSP1642               | <i>h+ leu1-32 ura4-D18 his7+:P<sub>Dis1</sub>-gfp-lacI-NLS sad1::sad1-dsRed-leu+ cen2::ura4-lacO<sub>n</sub></i>                                | WT strain with <i>lacO</i> array integrated near <i>cen2</i> (Chr2 centromere) locus and with expression of LacI-GFP (with nucleus localization signal) under control of the constitutive promoter. Fig. 2. | <i>this study derived from</i> PX342 and PN10127   |
| MKSP1661               | <i>h- leu1-32 ura4-D18 his7+:P<sub>Dis1</sub>-gfp-lacI-NLS cut11::cut11-mCherry-natR pfl5::ura4-lacO<sub>n</sub></i>                            | WT strain with <i>lacO</i> array (5.6 kb) integrated near <i>pfl5</i> locus (at <i>ChrII</i> : 4403547-4403553). Fig. 1b, 3b, Fig. S1a.                                                                     | [1]                                                |
| MKSP1794               | <i>leu1-32 ura4-D18 mis4::mis4-242<sup>ts</sup> his7+:P<sub>Dis1</sub>-gfp-lacI-NLS cut11::cut11-mCherry-natR pfl5::ura4-lacO<sub>n</sub></i>   | Temperature-sensitive mutant of Mis4 cohesin loading factor with <i>lacO</i> array (5.6 kb) integrated near <i>pfl5</i> locus. Fig. 3b.                                                                     | <i>this study derived from</i> MY3655 and MKSP1340 |
| MKSP2039               | <i>h+ leu1-32 ura4-D18 his7+:P<sub>Dis1</sub>-gfp-lacI-NLS mmf1::ura4-lacO<sub>n</sub></i>                                                      | WT strain with <i>lacO</i> array (10.3 kb) integrated near <i>mmf1</i> locus (at <i>ChrII</i> :3442981). Fig. 1b-c, 2, 3a, 5, 7, Fig. S1a, S2                                                               | <i>this study derived from</i> MKSP1381            |
| MKSP2583               | <i>h- leu1-32 ura4-D18 arp8::hygR his7+:P<sub>Dis1</sub>-gfp-lacI-NLS mmf1::ura4-lacO<sub>n</sub> urg1::loxP-kanR-loxM3</i>                     | <i>arp8</i> (INO80 complex subunit) deletion mutant with <i>lacO</i> array (10.3 kb) integrated near <i>mmf1</i> locus. Fig. 7.                                                                             | <i>this study derived from</i> MKSP2190            |
| MKSP2693               | <i>leu1-32 ura4-D18 cut14::cut14-208<sup>ts</sup> cut11::cut11-mCherry-natR his7+:P<sub>Dis1</sub>-gfp-lacI-NLS pfl5::ura4-lacO<sub>n</sub></i> | Temperature-sensitive mutant of Cut14 condensin subunit with <i>lacO</i> array (5.6 kb) integrated near <i>pfl5</i> locus. Fig. 3b.                                                                         | <i>this study derived from</i> MY1983              |
| MKSP2760               | <i>leu1-32 ura4-D18 cut14::cut14-208<sup>ts</sup> his7+:P<sub>Dis1</sub>-gfp-lacI-NLS mmf1::ura4-lacO<sub>n</sub></i>                           | Temperature-sensitive mutant of Cut14 condensin subunit with <i>lacO</i> array (10.3 kb) integrated near <i>mmf1</i> locus. Fig. 3a, 5b.                                                                    | <i>this study derived from</i> MY1997              |
| MKSP2801               | <i>leu1-32 ura4-D18 mis4::mis4-242<sup>ts</sup> his7+:P<sub>Dis1</sub>-gfp-lacI-NLS cut11::cut11-mCherry-natR mmf1::ura4-lacO<sub>n</sub></i>   | Temperature-sensitive mutant of Mis4 cohesin loading factor with <i>lacO</i> array (10.3 kb) integrated near <i>mmf1</i> locus. Fig. 3a.                                                                    | <i>this study derived from</i> MY3655 and MKSP1340 |
| MKSP3021               | <i>leu1-32 ura4-D18 arp9::kanR his7+:P<sub>Dis1</sub>-gfp-lacI-NLS mmf1::ura4-lacO<sub>n</sub></i>                                              | <i>arp9</i> (SWI/RSC complexes subunit) deletion with <i>lacO</i> array (10.3 kb) integrated near <i>mmf1</i> locus. Fig. 7a.                                                                               | <i>this study derived from</i> MKSP2352            |
| MKSP3053               | <i>leu1-32 ura4-D18 arp8::kanR cut14::cut14-208<sup>ts</sup> his7+:P<sub>Dis1</sub>-gfp-lacI-NLS mmf1::ura4-lacO<sub>n</sub></i>                | Double mutant with <i>arp8</i> deletion and temperature-sensitive mutant of Cut14 condensin subunit with <i>lacO</i> array (10.3 kb) integrated near <i>mmf1</i> locus. Fig. 7b.                            | <i>this study derived from</i> MKSP2187            |

|                                        |                                                                                                                                                                                                                                        |                                                                                                                                                                                                                             |                                           |
|----------------------------------------|----------------------------------------------------------------------------------------------------------------------------------------------------------------------------------------------------------------------------------------|-----------------------------------------------------------------------------------------------------------------------------------------------------------------------------------------------------------------------------|-------------------------------------------|
| MKSP3660                               | <i>leu1-32</i><br><i>cut14::cut14-208<sup>ts</sup></i><br><i>his7+::P<sub>Dis1</sub>-gfp-lacI-NLS</i><br><i>mmf1::ura4-lacO<sub>n</sub></i><br><i>rad21::rad21-XTEN17-3sAID-kanR</i><br><i>ura4::ura4-P<sub>adh1</sub>-OsTir1-F74A</i> | Double mutant bearing temperature-sensitive allele of Cut14 condensin subunit and rad21 cohesin subunit tagged with auxin-inducible degron with <i>lacO</i> array (10.3 kb) integrated near <i>mmf1</i> locus. Fig. 5b      | <i>this study derived from</i><br>DY48569 |
| <i>Random lacO position</i>            |                                                                                                                                                                                                                                        |                                                                                                                                                                                                                             |                                           |
| MKSP3117                               | <i>h+ leu1-32 ura4-D18</i><br><i>his7+::P<sub>Dis1</sub>-gfp-lacI-NLS</i><br><i>random locus::ura4-lacO<sub>n</sub></i>                                                                                                                | WT strain with <i>lacO</i> array (10.3 kb) integrated at random locus of the genome (noted as “site1”), and with LacI-GFP (with nucleus localization signal) under control of the constitutive promoter. Fig. 1b, Fig. S1a. | <i>derived from</i><br>MKSP1120           |
| MKSP3118                               | <i>h+ leu1-32 ura4-D18</i><br><i>his7+::P<sub>Dis1</sub>-gfp-lacI-NLS</i><br><i>random locus::ura4-lacO<sub>n</sub></i>                                                                                                                | Same as MKSP3117 but with a different random <i>lacO</i> array position (noted as “site2”). Fig. 1b, Fig. S1a.                                                                                                              | <i>derived from</i><br>MKSP1120           |
| MKSP3119                               | <i>h+ leu1-32 ura4-D18</i><br><i>his7+::P<sub>Dis1</sub>-gfp-lacI-NLS</i><br><i>random locus::ura4-lacO<sub>n</sub></i>                                                                                                                | Same as MKSP3117 but with a different random <i>lacO</i> array position (noted as “site3”). Fig. 1b, Fig. S1a.                                                                                                              | <i>derived from</i><br>MKSP1120           |
| MKSP3123                               | <i>h+ leu1-32 ura4-D18</i><br><i>his7+::P<sub>Dis1</sub>-gfp-lacI-NLS</i><br><i>random locus::ura4-lacO<sub>n</sub></i>                                                                                                                | Same as MKSP3117 but with a different random <i>lacO</i> array position (noted as “site4”). Fig. 1b, Fig. S1a.                                                                                                              | <i>derived from</i><br>MKSP1120           |
| <i>Labeled nuclear envelope strain</i> |                                                                                                                                                                                                                                        |                                                                                                                                                                                                                             |                                           |
| MKSP3140                               | <i>h+ leu1-32 ura4-D18</i><br><i>his7+::P<sub>Dis1</sub>-gfp-lacI-NLS</i><br><i>cut11::cut11-mCherry-natR</i><br><i>isd90::ura4-lacO<sub>n</sub></i>                                                                                   | WT strain with <i>lacO</i> array (10 kb) integrated near <i>isd90</i> locus (at <i>ChrII: 1950422</i> ). Fig. S2.                                                                                                           |                                           |
| <i>Auxiliary strains</i>               |                                                                                                                                                                                                                                        |                                                                                                                                                                                                                             |                                           |
| AW563                                  | <i>h- leu1-32</i><br><i>urg1::loxP-kanR-loxM3<sub>6</sub></i>                                                                                                                                                                          | WT strain with recombination-mediated cassette exchange system ( <i>RMCE<sub>kanMX6</sub></i> ).                                                                                                                            | [2]                                       |
| DY48569                                | <i>h+ mat1PA17</i><br><i>leu1-32 lys1-131 ade6-M216</i><br><i>ura4::ura4-P<sub>adh1</sub>-OsTir1-F74A</i>                                                                                                                              | Strain bearing an auxin-inducible degron system                                                                                                                                                                             | YGRC FY39923<br>[3]                       |
| JM210<br>FN198<br>MKSP1116             | <i>h- leu1-32 ura4-D18 ade-</i><br><i>cut11::cut11-mCherry-natMX6</i>                                                                                                                                                                  | WT strain with Cut11-mCherry (a nuclear envelope marker) expression controlled by the native promoter.                                                                                                                      | <i>Nurse lab</i>                          |
| MKSP1120                               | <i>h+ leu1-32 ura4-D18</i><br><i>his7+::P<sub>Dis1</sub>-gfp-lacI-NLS</i>                                                                                                                                                              | WT strain with LacI-GFP (with nucleus localization signal) under control of the constitutive promoter. Used to generate random <i>lacO</i> array integrations.                                                              |                                           |
| MKSP1340                               | <i>h- leu1-32 ura4-D18</i><br><i>his7+::P<sub>Dis1</sub>-gfp-lacI-NLS</i><br><i>cut11::cut11-mCherry-natR</i><br><i>mmf1::ura4-lacO<sub>n</sub></i><br><i>ChrII:3442981::ura4-lacO<sub>n</sub></i>                                     | WT strain with <i>lacO</i> array (10.3 kb) integrated near <i>mmf1</i> locus and with LacI-GFP (with nucleus localization signal) under control of the constitutive promoter                                                | <i>this study similar to</i><br>MKSP1381  |
| MKSP1381                               | <i>h- leu1-32 ura4-D18</i><br><i>his7+::P<sub>Dis1</sub>-gfp-lacI-NLS</i><br><i>ChrII:3442981::ura4-10.3kbLacO</i><br><i>ChrII:3446249::HOcs-hphMX6</i><br><i>cut11::cut11-mCherry-natMX6</i>                                          | Original <i>lacO</i> array (10.3 kb) integration near <i>mmf1</i> locus. Used to generate all other <i>mmf1-lacO<sub>n</sub></i> strains in this study                                                                      | [4]                                       |
| MKSP1128                               | <i>h- leu1-32 ura4-D18</i><br><i>his7+::P<sub>Dis1</sub>-gfp-lacI-NLS</i><br><i>cut11::cut11-mCherry-natMX6</i>                                                                                                                        | WT strain with Cut11-mCherry (a nuclear envelope marker) expression controlled by the native promoter and with LacI-GFP (with nucleus localization signal) under control of the constitutive promoter.                      |                                           |
| MKSP2187                               | <i>h- leu1-32 ura4-D18</i><br><i>arp8::kanR</i>                                                                                                                                                                                        | <i>arp8</i> deletion.                                                                                                                                                                                                       | <i>this study</i>                         |
| MKSP2190                               | <i>h- leu1-32 ura4-D18</i><br><i>arp8::hygR</i>                                                                                                                                                                                        | <i>arp8</i> deletion.                                                                                                                                                                                                       | <i>this study</i>                         |

|                             |                                                              |                                                                                                                                                                                               |                                                                   |
|-----------------------------|--------------------------------------------------------------|-----------------------------------------------------------------------------------------------------------------------------------------------------------------------------------------------|-------------------------------------------------------------------|
| MKSP2352                    | <i>h- leu1-32 ura4-D18 arp9::kanR</i>                        | <i>arp9</i> deletion.                                                                                                                                                                         | <i>this study</i>                                                 |
| MY1983                      | <i>h- ura4 cut14::cut14-208<sup>ts</sup></i>                 | Strain encoding for the temperature sensitive allele of <i>cut14</i> .                                                                                                                        | YGRC FY9883                                                       |
| MY1997                      | <i>h+ cut14::cut14-208<sup>ts</sup></i>                      | Strain encoding for the temperature sensitive allele of <i>cut14</i> .                                                                                                                        | YGRC FY9897                                                       |
| MY3655                      | <i>h- leu1-32 mis4::mis4-242<sup>ts</sup></i>                | Strain encoding for the temperature sensitive allele of <i>mis4</i> .                                                                                                                         | YGRC FY111578                                                     |
| PN10127                     | <i>h- sad1::sad1-dsRed-leu+</i>                              | WT strain with Sad1-dsRed (a spindle pole body marker) expression controlled by the native promoter.                                                                                          |                                                                   |
| PX342                       | <i>h+ leu1-32 ade6-M216 bub1::ura4 cen2-lacO<sub>n</sub></i> | Strain with <i>cen2</i> locus (centromere of ChrII) containing <i>lacO</i> array insertion.                                                                                                   | YGRC FY13812 [5]                                                  |
| <b><i>S. cerevisiae</i></b> |                                                              |                                                                                                                                                                                               |                                                                   |
| PCCPL645                    | W303<br><i>LacI-GFP::HIS</i>                                 | W303 strain with <i>LacI-GFP</i> (with nucleus localization signal) under control of the constitutive promoter.                                                                               | [6]                                                               |
| PCCPL835                    | W303<br><i>LacI-GFP::HIS ENA-lacO<sub>n</sub>::TRP1</i>      | W303 strain with <i>lacO</i> array integrated near <i>ENA</i> locus and with <i>LacI-GFP</i> (with nucleus localization signal) under control of the constitutive promoter. <i>Fig. S1b</i> . | <i>this study derived from PCCPL 645 as described [6] and [7]</i> |

### Table S3 References:

1. Zhao Y., Schreiner S.M., Koo P.K., Colombi P., King M.C., Mochrie S.G. (2016) Improved Determination of Subnuclear Position Enabled by Three-Dimensional Membrane Reconstruction. ***Biophys. J.*** 111, 19-24.
2. Watson A.T., Werler P., Carr A.M. (2011) Regulation of gene expression at the fission yeast *Schizosaccharomyces pombe* *urg1* locus. ***Gene*** 484, 75-85.
3. Zhang X.-R. Zhao L., Suo F., Gao Y., Wu Q., Qi X., Du L.-L. (2022) An improved auxin-inducible degron system for fission yeast. ***G3***, 12, jkab393.
3. Leland B.A., Chen A.C., Zhao A.Y., Wharton R.C., King M.C. (2018) Rev7 and 53BP1/Crb2 prevent RecQ helicase-dependent hyper-resection of DNA double-strand breaks. ***eLife*** 7, e33402.
4. Hauf S., Biswas A., Langegger M., Kawashima S.A., Tsukahara T, Watanabe Y. (2007) Aurora controls sister kinetochore mono-orientation and homolog bi-orientation in meiosis-I. ***EMBO J.*** 26, 4475-86.
5. Colombi P., King D.E., Williams J.F., Lusk C.L., King M.C. (2018) LEM domain proteins control the efficiency of adaptation through copy number variation. ***Biorxiv*** 451583, <https://www.biorxiv.org/content/biorxiv/early/2018/10/24/451583.full.pdf>
6. Murray J., Watson A., Carr A. (2016) *Identifying products of recombinase-mediated cassette exchange (RMCE) in Schizosaccharomyces pombe*. **Cold Spring Harbor Protocols**, 2016 (5)
