# Supplementary material for: Loops and the activity of loop extrusion factors constrain chromatin dynamics
Source: PubMed Central journal article supplement — Mol Biol Cell. 2023 Jul 1;34(8):ar78. doi: 10.1091/mbc.E23-04-0119 (PMC10398873; doi:10.1091/mbc.e23-04-0119), 2023-07-01
Supplement: mbc-34-ar78-s002.pdf [file mbc-34-ar78-s002.pdf]

# Loops and the activity of loop extrusion factors constrain chromatin dynamics

Mary Lou Bailey, Ivan Surovtsev, Jessica Williams, Hao Yan, Tianyu Yuan, Kevin Li, Katherine Duseau, Simon Mochrie, and Megan King

*Corresponding author(s): Megan King, Yale School of Medicine*

---

## Review Timeline:

|                     |            |
|---------------------|------------|
| Submission Date:    | 2023-04-05 |
| Editorial Decision: | 2023-04-10 |
| Revision Received:  | 2023-04-18 |
| Accepted:           | 2023-04-19 |

---

*Editor-in-Chief: Matthew Welch*

## Transaction Report:

(Note: With the exception of the correction of typographical or spelling errors that could be a source of ambiguity, letters and reports are not edited. The original formatting of letters and referee reports may not be reflected in this compilation.)

RE: Manuscript #E23-04-0119

TITLE: "Loops and the activity of loop extrusion factors constrain chromatin dynamics"

Dear Megan and co-authors,

Thank you for forwarding this manuscript and prior reviews to the Molecular Biology of the Cell. I appreciate your response to the reviewers comments and am pleased to inform you that your manuscript is acceptable for publication. I would offer one editorial suggestion. Considering the novelty of your model and its contribution to your paper, I was trying to find whether you modeled a single chain, or whether you tried to simulate the actual chain in a cell (confinement) in the presence of the entire genome (crowding)(as done in DOI: 10.1371/journal.pcbi.1007124 and DOI: 10.1093/nar/gkx741). It looks like you modeled a free unconfined chain (p. 37). I suggest that you point this out in the results section to make it easier for the reader to understand the limitations of the model.

Thank you for submitting this work to the Molecular Biology of the Cell, and congratulations to you and your authors.

Best,  
kerry

Kerry Bloom  
Monitoring Editor  
Molecular Biology of the Cell

-----  
Dear Dr. King,

The review of your manuscript, referenced above, is now complete. The Monitoring Editor has decided that your manuscript requires minor revisions before it can be published in Molecular Biology of the Cell, as described in the Monitoring Editor's decision letter above and the reviewer comments (if any) below.

A reminder: Please do not contact the Monitoring Editor directly regarding your manuscript. If you have any questions regarding the review process or the decision, please contact the MBoC Editorial Office ([mboc@ascb.org](mailto:mboc@ascb.org)).

When submitting your revision include a rebuttal letter that details, point-by-point, how the Monitoring Editor's and reviewers' comments have been addressed. (The file type for this letter must be "rebuttal letter"; do not include your response to the Monitoring Editor and reviewers in a "cover letter.") Please bear in mind that your rebuttal letter will be published with your paper if it is accepted, unless you have opted out of publishing the review history.

Authors are allowed 15 days to submit a revision. If this time period is inadequate, please contact us immediately at [mboc@ascb.org](mailto:mboc@ascb.org).

In preparing your revised manuscript, please follow the instruction in the Information for Authors ([www.molbiolcell.org/info-for-authors](http://www.molbiolcell.org/info-for-authors)). In particular, to prepare for the possible acceptance of your revised manuscript, submit final, publication-quality figures with your revision as described.

To submit the rebuttal letter, revised version, and figures, please use this link (please enable cookies, or cut and paste URL):  
Link Not Available

MBoC offers the option to publish your work with immediate open access. Open access can increase the discoverability and usability of your research. If you would like to publish your paper with immediate open access but did not select this option during initial submission, please contact us at [mboc@ascb.org](mailto:mboc@ascb.org).

Authors of Articles and Brief Communications whose manuscripts have returned for minor revision ("revise only") are encouraged to create a short video abstract to accompany their article when it is published. These video abstracts, known as Science Sketches, are up to 2 minutes long and will be published on YouTube and then embedded in the article abstract. Science Sketch Editors on the MBoC Editorial Board will provide guidance as you prepare your video. Information about how to prepare and submit a video abstract is available at [www.molbiolcell.org/science-sketches](http://www.molbiolcell.org/science-sketches). Please contact [mboc@ascb.org](mailto:mboc@ascb.org) if you are interested in creating a Science Sketch.

Thank you for submitting your manuscript to MBoC. Please do not hesitate to contact this office if you have any questions.

Sincerely,

Eric Baker  
Journal Production Manager  
MBoC Editorial Office  
mbc@ascb.org

-----



RE: Manuscript #E23-04-0119R

TITLE: "Loops and the activity of loop extrusion factors constrain chromatin dynamics"

Dear Megan and co-authors,

Thank you for your response to my few suggestions. I am pleased to inform you that your manuscript is now suitable for publication in the *Molecular Biology of the Cell*. Thank you for submitting this interesting work.

Kerry

Kerry Bloom  
Monitoring Editor  
*Molecular Biology of the Cell*

-----  
Dear Dr. King:

Congratulations on the acceptance of your manuscript! Thank you for choosing to publish your work in *Molecular Biology of the Cell* (MBoC).

Within 10 days, an unedited PDF of your manuscript will be published on MBoC in Press, an early release version of the journal. The date your manuscript appears on this site is the official publication date.

Your copyedited and typeset manuscript will be scheduled for publication in the next available issue of MBoC. Our production team will notify you when the page proofs of your paper are ready for your review.

MBoC offers the option to publish your paper with immediate open access. Open access can increase the discoverability and usability of your research. If you would like to publish your paper with immediate open access but did not select this option during initial submission, please contact the MBoC Editorial Office ([mbc@ascb.org](mailto:mbc@ascb.org)).

We invite you to submit images related to your accepted manuscript to be considered for the journal cover. Please contact [mboc@ascb.org](mailto:mboc@ascb.org) to learn how to submit candidate cover images.

Authors of Articles and Brief Communications are also encouraged to create a short video abstract to accompany their article when it is published. These video abstracts, known as Science Sketches, are up to 2 minutes long and will be published on YouTube and then embedded in the article abstract. Science Sketch Editors on the MBoC Editorial Board will provide guidance as you prepare your video. Information about how to prepare and submit a video abstract is available at [www.molbiolcell.org/science-sketches](http://www.molbiolcell.org/science-sketches). Please contact [mboc@ascb.org](mailto:mboc@ascb.org) if you are interested in creating a Science Sketch.

We look forward to publishing your paper in MBoC.

Sincerely,

Eric Baker  
Journal Production Manager  
MBoC Editorial Office  
[mbc@ascb.org](mailto:mbc@ascb.org)

-----
